# Supplementary material for: Bronchogenic cysts: a narrative review
Source: PubMed Central journal article supplement — Mediastinum. 2023 Apr 20;7:26. doi: 10.21037/med-22-46 (PMC10493618; doi:10.21037/med-22-46), 2023-04-20
Supplement: med-07-26-coif.pdf [file med-07-26-coif.pdf]

# ICMJE DISCLOSURE FORM

**Date:** 3/15/2023

**Your Name:** [Daniel J. Gross]

**Manuscript Title:** [Bronchogenic Cysts: A Narrative Review ]

**Manuscript Number (if known):** MED 22-46

In the interest of transparency, we ask you to disclose all relationships/activities/interests listed below that are related to the content of your manuscript. "Related" means any relation with for-profit or not-for-profit third parties whose interests may be affected by the content of the manuscript. Disclosure represents a commitment to transparency and does not necessarily indicate a bias. If you are in doubt about whether to list a relationship/activity/interest, it is preferable that you do so.

The author's relationships/activities/interests should be defined broadly. For example, if your manuscript pertains to the epidemiology of hypertension, you should declare all relationships with manufacturers of antihypertensive medication, even if that medication is not mentioned in the manuscript.

In item #1 below, report all support for the work reported in this manuscript without time limit. For all other items, the time frame for disclosure is the past 36 months.

|                                                           |                                                                                                                                                                                | Name all entities with whom you have this relationship or indicate none (add rows as needed)                                                                                                                                                                                                                                                                                                      | Specifications/Comments (e.g., if payments were made to you or to your institution) |  |  |  |  |                                           |  |
|-----------------------------------------------------------|--------------------------------------------------------------------------------------------------------------------------------------------------------------------------------|---------------------------------------------------------------------------------------------------------------------------------------------------------------------------------------------------------------------------------------------------------------------------------------------------------------------------------------------------------------------------------------------------|-------------------------------------------------------------------------------------|--|--|--|--|-------------------------------------------|--|
| <b>Time frame: Since the initial planning of the work</b> |                                                                                                                                                                                |                                                                                                                                                                                                                                                                                                                                                                                                   |                                                                                     |  |  |  |  |                                           |  |
| <b>1</b>                                                  | All support for the present manuscript (e.g., funding, provision of study materials, medical writing, article processing charges, etc.)<br><b>No time limit for this item.</b> | <input checked="" type="checkbox"/> <b>None</b><br><table border="1" style="width: 100%; margin-top: 5px;"> <tr><td style="width: 50%; height: 15px;"></td><td style="width: 50%;"></td></tr> <tr><td style="height: 15px;"></td><td></td></tr> <tr><td style="height: 15px;"></td><td style="text-align: center; font-size: small;">Click the tab key to add additional rows.</td></tr> </table> |                                                                                     |  |  |  |  | Click the tab key to add additional rows. |  |
|                                                           |                                                                                                                                                                                |                                                                                                                                                                                                                                                                                                                                                                                                   |                                                                                     |  |  |  |  |                                           |  |
|                                                           |                                                                                                                                                                                |                                                                                                                                                                                                                                                                                                                                                                                                   |                                                                                     |  |  |  |  |                                           |  |
|                                                           | Click the tab key to add additional rows.                                                                                                                                      |                                                                                                                                                                                                                                                                                                                                                                                                   |                                                                                     |  |  |  |  |                                           |  |
| <b>Time frame: past 36 months</b>                         |                                                                                                                                                                                |                                                                                                                                                                                                                                                                                                                                                                                                   |                                                                                     |  |  |  |  |                                           |  |
| <b>2</b>                                                  | Grants or contracts from any entity (if not indicated in item #1 above).                                                                                                       | <input checked="" type="checkbox"/> <b>None</b><br><table border="1" style="width: 100%; margin-top: 5px;"> <tr><td style="width: 50%; height: 15px;"></td><td style="width: 50%;"></td></tr> <tr><td style="height: 15px;"></td><td></td></tr> <tr><td style="height: 15px;"></td><td></td></tr> </table>                                                                                        |                                                                                     |  |  |  |  |                                           |  |
|                                                           |                                                                                                                                                                                |                                                                                                                                                                                                                                                                                                                                                                                                   |                                                                                     |  |  |  |  |                                           |  |
|                                                           |                                                                                                                                                                                |                                                                                                                                                                                                                                                                                                                                                                                                   |                                                                                     |  |  |  |  |                                           |  |
|                                                           |                                                                                                                                                                                |                                                                                                                                                                                                                                                                                                                                                                                                   |                                                                                     |  |  |  |  |                                           |  |
| <b>3</b>                                                  | Royalties or licenses                                                                                                                                                          | <input checked="" type="checkbox"/> <b>None</b><br><table border="1" style="width: 100%; margin-top: 5px;"> <tr><td style="width: 50%; height: 15px;"></td><td style="width: 50%;"></td></tr> <tr><td style="height: 15px;"></td><td></td></tr> <tr><td style="height: 15px;"></td><td></td></tr> </table>                                                                                        |                                                                                     |  |  |  |  |                                           |  |
|                                                           |                                                                                                                                                                                |                                                                                                                                                                                                                                                                                                                                                                                                   |                                                                                     |  |  |  |  |                                           |  |
|                                                           |                                                                                                                                                                                |                                                                                                                                                                                                                                                                                                                                                                                                   |                                                                                     |  |  |  |  |                                           |  |
|                                                           |                                                                                                                                                                                |                                                                                                                                                                                                                                                                                                                                                                                                   |                                                                                     |  |  |  |  |                                           |  |

|    |                                                                                                              | Name all entities with whom you have this relationship or indicate none (add rows as needed)                                                                                                                                                                                                                                                                    | Specifications/Comments (e.g., if payments were made to you or to your institution) |  |  |  |  |  |  |  |  |
|----|--------------------------------------------------------------------------------------------------------------|-----------------------------------------------------------------------------------------------------------------------------------------------------------------------------------------------------------------------------------------------------------------------------------------------------------------------------------------------------------------|-------------------------------------------------------------------------------------|--|--|--|--|--|--|--|--|
| 4  | Consulting fees                                                                                              | <input checked="" type="checkbox"/> None<br><table border="1" style="width: 100%; border-collapse: collapse;"> <tr><td style="width: 50%; height: 20px;"></td><td style="width: 50%;"></td></tr> <tr><td style="height: 20px;"></td><td></td></tr> <tr><td style="height: 20px;"></td><td></td></tr> <tr><td style="height: 20px;"></td><td></td></tr> </table> |                                                                                     |  |  |  |  |  |  |  |  |
|    |                                                                                                              |                                                                                                                                                                                                                                                                                                                                                                 |                                                                                     |  |  |  |  |  |  |  |  |
|    |                                                                                                              |                                                                                                                                                                                                                                                                                                                                                                 |                                                                                     |  |  |  |  |  |  |  |  |
|    |                                                                                                              |                                                                                                                                                                                                                                                                                                                                                                 |                                                                                     |  |  |  |  |  |  |  |  |
|    |                                                                                                              |                                                                                                                                                                                                                                                                                                                                                                 |                                                                                     |  |  |  |  |  |  |  |  |
| 5  | Payment or honoraria for lectures, presentations, speakers bureaus, manuscript writing or educational events | <input checked="" type="checkbox"/> None<br><table border="1" style="width: 100%; border-collapse: collapse;"> <tr><td style="width: 50%; height: 20px;"></td><td style="width: 50%;"></td></tr> <tr><td style="height: 20px;"></td><td></td></tr> <tr><td style="height: 20px;"></td><td></td></tr> </table>                                                   |                                                                                     |  |  |  |  |  |  |  |  |
|    |                                                                                                              |                                                                                                                                                                                                                                                                                                                                                                 |                                                                                     |  |  |  |  |  |  |  |  |
|    |                                                                                                              |                                                                                                                                                                                                                                                                                                                                                                 |                                                                                     |  |  |  |  |  |  |  |  |
|    |                                                                                                              |                                                                                                                                                                                                                                                                                                                                                                 |                                                                                     |  |  |  |  |  |  |  |  |
| 6  | Payment for expert testimony                                                                                 | <input checked="" type="checkbox"/> None<br><table border="1" style="width: 100%; border-collapse: collapse;"> <tr><td style="width: 50%; height: 20px;"></td><td style="width: 50%;"></td></tr> <tr><td style="height: 20px;"></td><td></td></tr> <tr><td style="height: 20px;"></td><td></td></tr> </table>                                                   |                                                                                     |  |  |  |  |  |  |  |  |
|    |                                                                                                              |                                                                                                                                                                                                                                                                                                                                                                 |                                                                                     |  |  |  |  |  |  |  |  |
|    |                                                                                                              |                                                                                                                                                                                                                                                                                                                                                                 |                                                                                     |  |  |  |  |  |  |  |  |
|    |                                                                                                              |                                                                                                                                                                                                                                                                                                                                                                 |                                                                                     |  |  |  |  |  |  |  |  |
| 7  | Support for attending meetings and/or travel                                                                 | <input checked="" type="checkbox"/> None<br><table border="1" style="width: 100%; border-collapse: collapse;"> <tr><td style="width: 50%; height: 20px;"></td><td style="width: 50%;"></td></tr> <tr><td style="height: 20px;"></td><td></td></tr> <tr><td style="height: 20px;"></td><td></td></tr> </table>                                                   |                                                                                     |  |  |  |  |  |  |  |  |
|    |                                                                                                              |                                                                                                                                                                                                                                                                                                                                                                 |                                                                                     |  |  |  |  |  |  |  |  |
|    |                                                                                                              |                                                                                                                                                                                                                                                                                                                                                                 |                                                                                     |  |  |  |  |  |  |  |  |
|    |                                                                                                              |                                                                                                                                                                                                                                                                                                                                                                 |                                                                                     |  |  |  |  |  |  |  |  |
| 8  | Patents planned, issued or pending                                                                           | <input checked="" type="checkbox"/> None<br><table border="1" style="width: 100%; border-collapse: collapse;"> <tr><td style="width: 50%; height: 20px;"></td><td style="width: 50%;"></td></tr> <tr><td style="height: 20px;"></td><td></td></tr> <tr><td style="height: 20px;"></td><td></td></tr> </table>                                                   |                                                                                     |  |  |  |  |  |  |  |  |
|    |                                                                                                              |                                                                                                                                                                                                                                                                                                                                                                 |                                                                                     |  |  |  |  |  |  |  |  |
|    |                                                                                                              |                                                                                                                                                                                                                                                                                                                                                                 |                                                                                     |  |  |  |  |  |  |  |  |
|    |                                                                                                              |                                                                                                                                                                                                                                                                                                                                                                 |                                                                                     |  |  |  |  |  |  |  |  |
| 9  | Participation on a Data Safety Monitoring Board or Advisory Board                                            | <input checked="" type="checkbox"/> None<br><table border="1" style="width: 100%; border-collapse: collapse;"> <tr><td style="width: 50%; height: 20px;"></td><td style="width: 50%;"></td></tr> <tr><td style="height: 20px;"></td><td></td></tr> <tr><td style="height: 20px;"></td><td></td></tr> </table>                                                   |                                                                                     |  |  |  |  |  |  |  |  |
|    |                                                                                                              |                                                                                                                                                                                                                                                                                                                                                                 |                                                                                     |  |  |  |  |  |  |  |  |
|    |                                                                                                              |                                                                                                                                                                                                                                                                                                                                                                 |                                                                                     |  |  |  |  |  |  |  |  |
|    |                                                                                                              |                                                                                                                                                                                                                                                                                                                                                                 |                                                                                     |  |  |  |  |  |  |  |  |
| 10 | Leadership or fiduciary role in other board, society, committee or advocacy group, paid or unpaid            | <input checked="" type="checkbox"/> None<br><table border="1" style="width: 100%; border-collapse: collapse;"> <tr><td style="width: 50%; height: 20px;"></td><td style="width: 50%;"></td></tr> <tr><td style="height: 20px;"></td><td></td></tr> <tr><td style="height: 20px;"></td><td></td></tr> </table>                                                   |                                                                                     |  |  |  |  |  |  |  |  |
|    |                                                                                                              |                                                                                                                                                                                                                                                                                                                                                                 |                                                                                     |  |  |  |  |  |  |  |  |
|    |                                                                                                              |                                                                                                                                                                                                                                                                                                                                                                 |                                                                                     |  |  |  |  |  |  |  |  |
|    |                                                                                                              |                                                                                                                                                                                                                                                                                                                                                                 |                                                                                     |  |  |  |  |  |  |  |  |

|    |                                                                                  | Name all entities with whom you have this relationship or indicate none (add rows as needed)                                                                                                                                                                                                                  | Specifications/Comments (e.g., if payments were made to you or to your institution) |  |  |  |  |  |  |
|----|----------------------------------------------------------------------------------|---------------------------------------------------------------------------------------------------------------------------------------------------------------------------------------------------------------------------------------------------------------------------------------------------------------|-------------------------------------------------------------------------------------|--|--|--|--|--|--|
| 11 | Stock or stock options                                                           | <input checked="" type="checkbox"/> None<br><table border="1" style="width: 100%; border-collapse: collapse;"> <tr><td style="width: 50%; height: 20px;"></td><td style="width: 50%;"></td></tr> <tr><td style="height: 20px;"></td><td></td></tr> <tr><td style="height: 20px;"></td><td></td></tr> </table> |                                                                                     |  |  |  |  |  |  |
|    |                                                                                  |                                                                                                                                                                                                                                                                                                               |                                                                                     |  |  |  |  |  |  |
|    |                                                                                  |                                                                                                                                                                                                                                                                                                               |                                                                                     |  |  |  |  |  |  |
|    |                                                                                  |                                                                                                                                                                                                                                                                                                               |                                                                                     |  |  |  |  |  |  |
| 12 | Receipt of equipment, materials, drugs, medical writing, gifts or other services | <input checked="" type="checkbox"/> None<br><table border="1" style="width: 100%; border-collapse: collapse;"> <tr><td style="width: 50%; height: 20px;"></td><td style="width: 50%;"></td></tr> <tr><td style="height: 20px;"></td><td></td></tr> <tr><td style="height: 20px;"></td><td></td></tr> </table> |                                                                                     |  |  |  |  |  |  |
|    |                                                                                  |                                                                                                                                                                                                                                                                                                               |                                                                                     |  |  |  |  |  |  |
|    |                                                                                  |                                                                                                                                                                                                                                                                                                               |                                                                                     |  |  |  |  |  |  |
|    |                                                                                  |                                                                                                                                                                                                                                                                                                               |                                                                                     |  |  |  |  |  |  |
| 13 | Other financial or non-financial interests                                       | <input checked="" type="checkbox"/> None<br><table border="1" style="width: 100%; border-collapse: collapse;"> <tr><td style="width: 50%; height: 20px;"></td><td style="width: 50%;"></td></tr> <tr><td style="height: 20px;"></td><td></td></tr> <tr><td style="height: 20px;"></td><td></td></tr> </table> |                                                                                     |  |  |  |  |  |  |
|    |                                                                                  |                                                                                                                                                                                                                                                                                                               |                                                                                     |  |  |  |  |  |  |
|    |                                                                                  |                                                                                                                                                                                                                                                                                                               |                                                                                     |  |  |  |  |  |  |
|    |                                                                                  |                                                                                                                                                                                                                                                                                                               |                                                                                     |  |  |  |  |  |  |

Please place an "X" next to the following statement to indicate your agreement:

**Summary: NO conflicts of interest**

I certify that I have answered every question and have not altered the wording of any of the questions on this form.

# ICMJE DISCLOSURE FORM

**Date:** 3/15/2023

**Your Name:** [Lawrence M Briski ]

**Manuscript Title:** [Bronchogenic Cysts: A Narrative Review ]

**Manuscript Number (if known):** MED 22-46

In the interest of transparency, we ask you to disclose all relationships/activities/interests listed below that are related to the content of your manuscript. "Related" means any relation with for-profit or not-for-profit third parties whose interests may be affected by the content of the manuscript. Disclosure represents a commitment to transparency and does not necessarily indicate a bias. If you are in doubt about whether to list a relationship/activity/interest, it is preferable that you do so.

The author's relationships/activities/interests should be defined broadly. For example, if your manuscript pertains to the epidemiology of hypertension, you should declare all relationships with manufacturers of antihypertensive medication, even if that medication is not mentioned in the manuscript.

In item #1 below, report all support for the work reported in this manuscript without time limit. For all other items, the time frame for disclosure is the past 36 months.

|                                                           |                                                                                                                                                                                | Name all entities with whom you have this relationship or indicate none (add rows as needed)                                                                                                                                                                                                                                                                                                      | Specifications/Comments (e.g., if payments were made to you or to your institution) |  |  |  |  |                                           |  |
|-----------------------------------------------------------|--------------------------------------------------------------------------------------------------------------------------------------------------------------------------------|---------------------------------------------------------------------------------------------------------------------------------------------------------------------------------------------------------------------------------------------------------------------------------------------------------------------------------------------------------------------------------------------------|-------------------------------------------------------------------------------------|--|--|--|--|-------------------------------------------|--|
| <b>Time frame: Since the initial planning of the work</b> |                                                                                                                                                                                |                                                                                                                                                                                                                                                                                                                                                                                                   |                                                                                     |  |  |  |  |                                           |  |
| <b>1</b>                                                  | All support for the present manuscript (e.g., funding, provision of study materials, medical writing, article processing charges, etc.)<br><b>No time limit for this item.</b> | <input checked="" type="checkbox"/> <b>None</b><br><table border="1" style="width: 100%; margin-top: 5px;"> <tr><td style="width: 50%; height: 15px;"></td><td style="width: 50%;"></td></tr> <tr><td style="height: 15px;"></td><td></td></tr> <tr><td style="height: 15px;"></td><td style="text-align: center; font-size: small;">Click the tab key to add additional rows.</td></tr> </table> |                                                                                     |  |  |  |  | Click the tab key to add additional rows. |  |
|                                                           |                                                                                                                                                                                |                                                                                                                                                                                                                                                                                                                                                                                                   |                                                                                     |  |  |  |  |                                           |  |
|                                                           |                                                                                                                                                                                |                                                                                                                                                                                                                                                                                                                                                                                                   |                                                                                     |  |  |  |  |                                           |  |
|                                                           | Click the tab key to add additional rows.                                                                                                                                      |                                                                                                                                                                                                                                                                                                                                                                                                   |                                                                                     |  |  |  |  |                                           |  |
| <b>Time frame: past 36 months</b>                         |                                                                                                                                                                                |                                                                                                                                                                                                                                                                                                                                                                                                   |                                                                                     |  |  |  |  |                                           |  |
| <b>2</b>                                                  | Grants or contracts from any entity (if not indicated in item #1 above).                                                                                                       | <input checked="" type="checkbox"/> <b>None</b><br><table border="1" style="width: 100%; margin-top: 5px;"> <tr><td style="width: 50%; height: 15px;"></td><td style="width: 50%;"></td></tr> <tr><td style="height: 15px;"></td><td></td></tr> <tr><td style="height: 15px;"></td><td></td></tr> </table>                                                                                        |                                                                                     |  |  |  |  |                                           |  |
|                                                           |                                                                                                                                                                                |                                                                                                                                                                                                                                                                                                                                                                                                   |                                                                                     |  |  |  |  |                                           |  |
|                                                           |                                                                                                                                                                                |                                                                                                                                                                                                                                                                                                                                                                                                   |                                                                                     |  |  |  |  |                                           |  |
|                                                           |                                                                                                                                                                                |                                                                                                                                                                                                                                                                                                                                                                                                   |                                                                                     |  |  |  |  |                                           |  |
| <b>3</b>                                                  | Royalties or licenses                                                                                                                                                          | <input checked="" type="checkbox"/> <b>None</b><br><table border="1" style="width: 100%; margin-top: 5px;"> <tr><td style="width: 50%; height: 15px;"></td><td style="width: 50%;"></td></tr> <tr><td style="height: 15px;"></td><td></td></tr> <tr><td style="height: 15px;"></td><td></td></tr> </table>                                                                                        |                                                                                     |  |  |  |  |                                           |  |
|                                                           |                                                                                                                                                                                |                                                                                                                                                                                                                                                                                                                                                                                                   |                                                                                     |  |  |  |  |                                           |  |
|                                                           |                                                                                                                                                                                |                                                                                                                                                                                                                                                                                                                                                                                                   |                                                                                     |  |  |  |  |                                           |  |
|                                                           |                                                                                                                                                                                |                                                                                                                                                                                                                                                                                                                                                                                                   |                                                                                     |  |  |  |  |                                           |  |

|    |                                                                                                              | Name all entities with whom you have this relationship or indicate none (add rows as needed)                                                                                                    | Specifications/Comments (e.g., if payments were made to you or to your institution) |  |  |  |  |  |  |  |  |
|----|--------------------------------------------------------------------------------------------------------------|-------------------------------------------------------------------------------------------------------------------------------------------------------------------------------------------------|-------------------------------------------------------------------------------------|--|--|--|--|--|--|--|--|
| 4  | Consulting fees                                                                                              | <input checked="" type="checkbox"/> None<br><table border="1"> <tr><td> </td><td> </td></tr> <tr><td> </td><td> </td></tr> <tr><td> </td><td> </td></tr> <tr><td> </td><td> </td></tr> </table> |                                                                                     |  |  |  |  |  |  |  |  |
|    |                                                                                                              |                                                                                                                                                                                                 |                                                                                     |  |  |  |  |  |  |  |  |
|    |                                                                                                              |                                                                                                                                                                                                 |                                                                                     |  |  |  |  |  |  |  |  |
|    |                                                                                                              |                                                                                                                                                                                                 |                                                                                     |  |  |  |  |  |  |  |  |
|    |                                                                                                              |                                                                                                                                                                                                 |                                                                                     |  |  |  |  |  |  |  |  |
| 5  | Payment or honoraria for lectures, presentations, speakers bureaus, manuscript writing or educational events | <input checked="" type="checkbox"/> None<br><table border="1"> <tr><td> </td><td> </td></tr> <tr><td> </td><td> </td></tr> <tr><td> </td><td> </td></tr> </table>                               |                                                                                     |  |  |  |  |  |  |  |  |
|    |                                                                                                              |                                                                                                                                                                                                 |                                                                                     |  |  |  |  |  |  |  |  |
|    |                                                                                                              |                                                                                                                                                                                                 |                                                                                     |  |  |  |  |  |  |  |  |
|    |                                                                                                              |                                                                                                                                                                                                 |                                                                                     |  |  |  |  |  |  |  |  |
| 6  | Payment for expert testimony                                                                                 | <input checked="" type="checkbox"/> None<br><table border="1"> <tr><td> </td><td> </td></tr> <tr><td> </td><td> </td></tr> <tr><td> </td><td> </td></tr> </table>                               |                                                                                     |  |  |  |  |  |  |  |  |
|    |                                                                                                              |                                                                                                                                                                                                 |                                                                                     |  |  |  |  |  |  |  |  |
|    |                                                                                                              |                                                                                                                                                                                                 |                                                                                     |  |  |  |  |  |  |  |  |
|    |                                                                                                              |                                                                                                                                                                                                 |                                                                                     |  |  |  |  |  |  |  |  |
| 7  | Support for attending meetings and/or travel                                                                 | <input checked="" type="checkbox"/> None<br><table border="1"> <tr><td> </td><td> </td></tr> <tr><td> </td><td> </td></tr> <tr><td> </td><td> </td></tr> </table>                               |                                                                                     |  |  |  |  |  |  |  |  |
|    |                                                                                                              |                                                                                                                                                                                                 |                                                                                     |  |  |  |  |  |  |  |  |
|    |                                                                                                              |                                                                                                                                                                                                 |                                                                                     |  |  |  |  |  |  |  |  |
|    |                                                                                                              |                                                                                                                                                                                                 |                                                                                     |  |  |  |  |  |  |  |  |
| 8  | Patents planned, issued or pending                                                                           | <input checked="" type="checkbox"/> None<br><table border="1"> <tr><td> </td><td> </td></tr> <tr><td> </td><td> </td></tr> <tr><td> </td><td> </td></tr> </table>                               |                                                                                     |  |  |  |  |  |  |  |  |
|    |                                                                                                              |                                                                                                                                                                                                 |                                                                                     |  |  |  |  |  |  |  |  |
|    |                                                                                                              |                                                                                                                                                                                                 |                                                                                     |  |  |  |  |  |  |  |  |
|    |                                                                                                              |                                                                                                                                                                                                 |                                                                                     |  |  |  |  |  |  |  |  |
| 9  | Participation on a Data Safety Monitoring Board or Advisory Board                                            | <input checked="" type="checkbox"/> None<br><table border="1"> <tr><td> </td><td> </td></tr> <tr><td> </td><td> </td></tr> <tr><td> </td><td> </td></tr> </table>                               |                                                                                     |  |  |  |  |  |  |  |  |
|    |                                                                                                              |                                                                                                                                                                                                 |                                                                                     |  |  |  |  |  |  |  |  |
|    |                                                                                                              |                                                                                                                                                                                                 |                                                                                     |  |  |  |  |  |  |  |  |
|    |                                                                                                              |                                                                                                                                                                                                 |                                                                                     |  |  |  |  |  |  |  |  |
| 10 | Leadership or fiduciary role in other board, society, committee or advocacy group, paid or unpaid            | <input checked="" type="checkbox"/> None<br><table border="1"> <tr><td> </td><td> </td></tr> <tr><td> </td><td> </td></tr> <tr><td> </td><td> </td></tr> </table>                               |                                                                                     |  |  |  |  |  |  |  |  |
|    |                                                                                                              |                                                                                                                                                                                                 |                                                                                     |  |  |  |  |  |  |  |  |
|    |                                                                                                              |                                                                                                                                                                                                 |                                                                                     |  |  |  |  |  |  |  |  |
|    |                                                                                                              |                                                                                                                                                                                                 |                                                                                     |  |  |  |  |  |  |  |  |

|    |                                                                                  | Name all entities with whom you have this relationship or indicate none (add rows as needed)                                                                                                                                                                                                                  | Specifications/Comments (e.g., if payments were made to you or to your institution) |  |  |  |  |  |  |
|----|----------------------------------------------------------------------------------|---------------------------------------------------------------------------------------------------------------------------------------------------------------------------------------------------------------------------------------------------------------------------------------------------------------|-------------------------------------------------------------------------------------|--|--|--|--|--|--|
| 11 | Stock or stock options                                                           | <input checked="" type="checkbox"/> None<br><table border="1" style="width: 100%; border-collapse: collapse;"> <tr><td style="width: 50%; height: 20px;"></td><td style="width: 50%;"></td></tr> <tr><td style="height: 20px;"></td><td></td></tr> <tr><td style="height: 20px;"></td><td></td></tr> </table> |                                                                                     |  |  |  |  |  |  |
|    |                                                                                  |                                                                                                                                                                                                                                                                                                               |                                                                                     |  |  |  |  |  |  |
|    |                                                                                  |                                                                                                                                                                                                                                                                                                               |                                                                                     |  |  |  |  |  |  |
|    |                                                                                  |                                                                                                                                                                                                                                                                                                               |                                                                                     |  |  |  |  |  |  |
| 12 | Receipt of equipment, materials, drugs, medical writing, gifts or other services | <input checked="" type="checkbox"/> None<br><table border="1" style="width: 100%; border-collapse: collapse;"> <tr><td style="width: 50%; height: 20px;"></td><td style="width: 50%;"></td></tr> <tr><td style="height: 20px;"></td><td></td></tr> <tr><td style="height: 20px;"></td><td></td></tr> </table> |                                                                                     |  |  |  |  |  |  |
|    |                                                                                  |                                                                                                                                                                                                                                                                                                               |                                                                                     |  |  |  |  |  |  |
|    |                                                                                  |                                                                                                                                                                                                                                                                                                               |                                                                                     |  |  |  |  |  |  |
|    |                                                                                  |                                                                                                                                                                                                                                                                                                               |                                                                                     |  |  |  |  |  |  |
| 13 | Other financial or non-financial interests                                       | <input checked="" type="checkbox"/> None<br><table border="1" style="width: 100%; border-collapse: collapse;"> <tr><td style="width: 50%; height: 20px;"></td><td style="width: 50%;"></td></tr> <tr><td style="height: 20px;"></td><td></td></tr> <tr><td style="height: 20px;"></td><td></td></tr> </table> |                                                                                     |  |  |  |  |  |  |
|    |                                                                                  |                                                                                                                                                                                                                                                                                                               |                                                                                     |  |  |  |  |  |  |
|    |                                                                                  |                                                                                                                                                                                                                                                                                                               |                                                                                     |  |  |  |  |  |  |
|    |                                                                                  |                                                                                                                                                                                                                                                                                                               |                                                                                     |  |  |  |  |  |  |

Please place an "X" next to the following statement to indicate your agreement:

**Summary: NO conflicts of interest**

I certify that I have answered every question and have not altered the wording of any of the questions on this form.

# ICMJE DISCLOSURE FORM

**Date:** 3/15/2023

**Your Name:** [Eric M. Wherley]

**Manuscript Title:** [Bronchogenic Cysts: A Narrative Review ]

**Manuscript Number (if known):** MED 22-46

In the interest of transparency, we ask you to disclose all relationships/activities/interests listed below that are related to the content of your manuscript. "Related" means any relation with for-profit or not-for-profit third parties whose interests may be affected by the content of the manuscript. Disclosure represents a commitment to transparency and does not necessarily indicate a bias. If you are in doubt about whether to list a relationship/activity/interest, it is preferable that you do so.

The author's relationships/activities/interests should be defined broadly. For example, if your manuscript pertains to the epidemiology of hypertension, you should declare all relationships with manufacturers of antihypertensive medication, even if that medication is not mentioned in the manuscript.

In item #1 below, report all support for the work reported in this manuscript without time limit. For all other items, the time frame for disclosure is the past 36 months.

|                                                           |                                                                                                                                                                                | Name all entities with whom you have this relationship or indicate none (add rows as needed)                                                                                                                                                                                                                                                                                                                                 | Specifications/Comments (e.g., if payments were made to you or to your institution) |  |  |  |  |                                           |  |
|-----------------------------------------------------------|--------------------------------------------------------------------------------------------------------------------------------------------------------------------------------|------------------------------------------------------------------------------------------------------------------------------------------------------------------------------------------------------------------------------------------------------------------------------------------------------------------------------------------------------------------------------------------------------------------------------|-------------------------------------------------------------------------------------|--|--|--|--|-------------------------------------------|--|
| <b>Time frame: Since the initial planning of the work</b> |                                                                                                                                                                                |                                                                                                                                                                                                                                                                                                                                                                                                                              |                                                                                     |  |  |  |  |                                           |  |
| <b>1</b>                                                  | All support for the present manuscript (e.g., funding, provision of study materials, medical writing, article processing charges, etc.)<br><b>No time limit for this item.</b> | <input checked="" type="checkbox"/> <b>None</b><br><table border="1" style="width: 100%; border-collapse: collapse; margin-top: 5px;"> <tr><td style="width: 50%; height: 15px;"></td><td style="width: 50%;"></td></tr> <tr><td style="height: 15px;"></td><td></td></tr> <tr><td style="height: 15px;"></td><td style="text-align: center; font-size: small;">Click the tab key to add additional rows.</td></tr> </table> |                                                                                     |  |  |  |  | Click the tab key to add additional rows. |  |
|                                                           |                                                                                                                                                                                |                                                                                                                                                                                                                                                                                                                                                                                                                              |                                                                                     |  |  |  |  |                                           |  |
|                                                           |                                                                                                                                                                                |                                                                                                                                                                                                                                                                                                                                                                                                                              |                                                                                     |  |  |  |  |                                           |  |
|                                                           | Click the tab key to add additional rows.                                                                                                                                      |                                                                                                                                                                                                                                                                                                                                                                                                                              |                                                                                     |  |  |  |  |                                           |  |
| <b>Time frame: past 36 months</b>                         |                                                                                                                                                                                |                                                                                                                                                                                                                                                                                                                                                                                                                              |                                                                                     |  |  |  |  |                                           |  |
| <b>2</b>                                                  | Grants or contracts from any entity (if not indicated in item #1 above).                                                                                                       | <input checked="" type="checkbox"/> <b>None</b><br><table border="1" style="width: 100%; border-collapse: collapse; margin-top: 5px;"> <tr><td style="width: 50%; height: 15px;"></td><td style="width: 50%;"></td></tr> <tr><td style="height: 15px;"></td><td></td></tr> <tr><td style="height: 15px;"></td><td></td></tr> </table>                                                                                        |                                                                                     |  |  |  |  |                                           |  |
|                                                           |                                                                                                                                                                                |                                                                                                                                                                                                                                                                                                                                                                                                                              |                                                                                     |  |  |  |  |                                           |  |
|                                                           |                                                                                                                                                                                |                                                                                                                                                                                                                                                                                                                                                                                                                              |                                                                                     |  |  |  |  |                                           |  |
|                                                           |                                                                                                                                                                                |                                                                                                                                                                                                                                                                                                                                                                                                                              |                                                                                     |  |  |  |  |                                           |  |
| <b>3</b>                                                  | Royalties or licenses                                                                                                                                                          | <input checked="" type="checkbox"/> <b>None</b><br><table border="1" style="width: 100%; border-collapse: collapse; margin-top: 5px;"> <tr><td style="width: 50%; height: 15px;"></td><td style="width: 50%;"></td></tr> <tr><td style="height: 15px;"></td><td></td></tr> <tr><td style="height: 15px;"></td><td></td></tr> </table>                                                                                        |                                                                                     |  |  |  |  |                                           |  |
|                                                           |                                                                                                                                                                                |                                                                                                                                                                                                                                                                                                                                                                                                                              |                                                                                     |  |  |  |  |                                           |  |
|                                                           |                                                                                                                                                                                |                                                                                                                                                                                                                                                                                                                                                                                                                              |                                                                                     |  |  |  |  |                                           |  |
|                                                           |                                                                                                                                                                                |                                                                                                                                                                                                                                                                                                                                                                                                                              |                                                                                     |  |  |  |  |                                           |  |

|    |                                                                                                              | Name all entities with whom you have this relationship or indicate none (add rows as needed)                                                                                                    | Specifications/Comments (e.g., if payments were made to you or to your institution) |  |  |  |  |  |  |  |  |
|----|--------------------------------------------------------------------------------------------------------------|-------------------------------------------------------------------------------------------------------------------------------------------------------------------------------------------------|-------------------------------------------------------------------------------------|--|--|--|--|--|--|--|--|
| 4  | Consulting fees                                                                                              | <input checked="" type="checkbox"/> None<br><table border="1"> <tr><td> </td><td> </td></tr> <tr><td> </td><td> </td></tr> <tr><td> </td><td> </td></tr> <tr><td> </td><td> </td></tr> </table> |                                                                                     |  |  |  |  |  |  |  |  |
|    |                                                                                                              |                                                                                                                                                                                                 |                                                                                     |  |  |  |  |  |  |  |  |
|    |                                                                                                              |                                                                                                                                                                                                 |                                                                                     |  |  |  |  |  |  |  |  |
|    |                                                                                                              |                                                                                                                                                                                                 |                                                                                     |  |  |  |  |  |  |  |  |
|    |                                                                                                              |                                                                                                                                                                                                 |                                                                                     |  |  |  |  |  |  |  |  |
| 5  | Payment or honoraria for lectures, presentations, speakers bureaus, manuscript writing or educational events | <input checked="" type="checkbox"/> None<br><table border="1"> <tr><td> </td><td> </td></tr> <tr><td> </td><td> </td></tr> <tr><td> </td><td> </td></tr> </table>                               |                                                                                     |  |  |  |  |  |  |  |  |
|    |                                                                                                              |                                                                                                                                                                                                 |                                                                                     |  |  |  |  |  |  |  |  |
|    |                                                                                                              |                                                                                                                                                                                                 |                                                                                     |  |  |  |  |  |  |  |  |
|    |                                                                                                              |                                                                                                                                                                                                 |                                                                                     |  |  |  |  |  |  |  |  |
| 6  | Payment for expert testimony                                                                                 | <input checked="" type="checkbox"/> None<br><table border="1"> <tr><td> </td><td> </td></tr> <tr><td> </td><td> </td></tr> <tr><td> </td><td> </td></tr> </table>                               |                                                                                     |  |  |  |  |  |  |  |  |
|    |                                                                                                              |                                                                                                                                                                                                 |                                                                                     |  |  |  |  |  |  |  |  |
|    |                                                                                                              |                                                                                                                                                                                                 |                                                                                     |  |  |  |  |  |  |  |  |
|    |                                                                                                              |                                                                                                                                                                                                 |                                                                                     |  |  |  |  |  |  |  |  |
| 7  | Support for attending meetings and/or travel                                                                 | <input checked="" type="checkbox"/> None<br><table border="1"> <tr><td> </td><td> </td></tr> <tr><td> </td><td> </td></tr> <tr><td> </td><td> </td></tr> </table>                               |                                                                                     |  |  |  |  |  |  |  |  |
|    |                                                                                                              |                                                                                                                                                                                                 |                                                                                     |  |  |  |  |  |  |  |  |
|    |                                                                                                              |                                                                                                                                                                                                 |                                                                                     |  |  |  |  |  |  |  |  |
|    |                                                                                                              |                                                                                                                                                                                                 |                                                                                     |  |  |  |  |  |  |  |  |
| 8  | Patents planned, issued or pending                                                                           | <input checked="" type="checkbox"/> None<br><table border="1"> <tr><td> </td><td> </td></tr> <tr><td> </td><td> </td></tr> <tr><td> </td><td> </td></tr> </table>                               |                                                                                     |  |  |  |  |  |  |  |  |
|    |                                                                                                              |                                                                                                                                                                                                 |                                                                                     |  |  |  |  |  |  |  |  |
|    |                                                                                                              |                                                                                                                                                                                                 |                                                                                     |  |  |  |  |  |  |  |  |
|    |                                                                                                              |                                                                                                                                                                                                 |                                                                                     |  |  |  |  |  |  |  |  |
| 9  | Participation on a Data Safety Monitoring Board or Advisory Board                                            | <input checked="" type="checkbox"/> None<br><table border="1"> <tr><td> </td><td> </td></tr> <tr><td> </td><td> </td></tr> <tr><td> </td><td> </td></tr> </table>                               |                                                                                     |  |  |  |  |  |  |  |  |
|    |                                                                                                              |                                                                                                                                                                                                 |                                                                                     |  |  |  |  |  |  |  |  |
|    |                                                                                                              |                                                                                                                                                                                                 |                                                                                     |  |  |  |  |  |  |  |  |
|    |                                                                                                              |                                                                                                                                                                                                 |                                                                                     |  |  |  |  |  |  |  |  |
| 10 | Leadership or fiduciary role in other board, society, committee or advocacy group, paid or unpaid            | <input checked="" type="checkbox"/> None<br><table border="1"> <tr><td> </td><td> </td></tr> <tr><td> </td><td> </td></tr> <tr><td> </td><td> </td></tr> </table>                               |                                                                                     |  |  |  |  |  |  |  |  |
|    |                                                                                                              |                                                                                                                                                                                                 |                                                                                     |  |  |  |  |  |  |  |  |
|    |                                                                                                              |                                                                                                                                                                                                 |                                                                                     |  |  |  |  |  |  |  |  |
|    |                                                                                                              |                                                                                                                                                                                                 |                                                                                     |  |  |  |  |  |  |  |  |



|    |                                                                                  | Name all entities with whom you have this relationship or indicate none (add rows as needed)                                                                                                                                                                                                                  | Specifications/Comments (e.g., if payments were made to you or to your institution) |  |  |  |  |  |  |
|----|----------------------------------------------------------------------------------|---------------------------------------------------------------------------------------------------------------------------------------------------------------------------------------------------------------------------------------------------------------------------------------------------------------|-------------------------------------------------------------------------------------|--|--|--|--|--|--|
| 11 | Stock or stock options                                                           | <input checked="" type="checkbox"/> None<br><table border="1" style="width: 100%; border-collapse: collapse;"> <tr><td style="width: 50%; height: 20px;"></td><td style="width: 50%;"></td></tr> <tr><td style="height: 20px;"></td><td></td></tr> <tr><td style="height: 20px;"></td><td></td></tr> </table> |                                                                                     |  |  |  |  |  |  |
|    |                                                                                  |                                                                                                                                                                                                                                                                                                               |                                                                                     |  |  |  |  |  |  |
|    |                                                                                  |                                                                                                                                                                                                                                                                                                               |                                                                                     |  |  |  |  |  |  |
|    |                                                                                  |                                                                                                                                                                                                                                                                                                               |                                                                                     |  |  |  |  |  |  |
| 12 | Receipt of equipment, materials, drugs, medical writing, gifts or other services | <input checked="" type="checkbox"/> None<br><table border="1" style="width: 100%; border-collapse: collapse;"> <tr><td style="width: 50%; height: 20px;"></td><td style="width: 50%;"></td></tr> <tr><td style="height: 20px;"></td><td></td></tr> <tr><td style="height: 20px;"></td><td></td></tr> </table> |                                                                                     |  |  |  |  |  |  |
|    |                                                                                  |                                                                                                                                                                                                                                                                                                               |                                                                                     |  |  |  |  |  |  |
|    |                                                                                  |                                                                                                                                                                                                                                                                                                               |                                                                                     |  |  |  |  |  |  |
|    |                                                                                  |                                                                                                                                                                                                                                                                                                               |                                                                                     |  |  |  |  |  |  |
| 13 | Other financial or non-financial interests                                       | <input checked="" type="checkbox"/> None<br><table border="1" style="width: 100%; border-collapse: collapse;"> <tr><td style="width: 50%; height: 20px;"></td><td style="width: 50%;"></td></tr> <tr><td style="height: 20px;"></td><td></td></tr> <tr><td style="height: 20px;"></td><td></td></tr> </table> |                                                                                     |  |  |  |  |  |  |
|    |                                                                                  |                                                                                                                                                                                                                                                                                                               |                                                                                     |  |  |  |  |  |  |
|    |                                                                                  |                                                                                                                                                                                                                                                                                                               |                                                                                     |  |  |  |  |  |  |
|    |                                                                                  |                                                                                                                                                                                                                                                                                                               |                                                                                     |  |  |  |  |  |  |

Please place an "X" next to the following statement to indicate your agreement:

**Summary: NO conflicts of interest**

I certify that I have answered every question and have not altered the wording of any of the questions on this form.

# ICMJE DISCLOSURE FORM

**Date:** 3/15/2023

**Your Name:** [ Dao M Nguyen ]

**Manuscript Title:** [ Bronchogenic Cysts: A Narrative Review ]

**Manuscript Number (if known):** MED 22-46

In the interest of transparency, we ask you to disclose all relationships/activities/interests listed below that are related to the content of your manuscript. "Related" means any relation with for-profit or not-for-profit third parties whose interests may be affected by the content of the manuscript. Disclosure represents a commitment to transparency and does not necessarily indicate a bias. If you are in doubt about whether to list a relationship/activity/interest, it is preferable that you do so.

The author's relationships/activities/interests should be defined broadly. For example, if your manuscript pertains to the epidemiology of hypertension, you should declare all relationships with manufacturers of antihypertensive medication, even if that medication is not mentioned in the manuscript.

In item #1 below, report all support for the work reported in this manuscript without time limit. For all other items, the time frame for disclosure is the past 36 months.

|                                                           | Name all entities with whom you have this relationship or indicate none (add rows as needed)                                                                                   | Specifications/Comments (e.g., if payments were made to you or to your institution)                                                                                                                                                                                                                                                                                                                                          |  |  |  |  |  |                                           |
|-----------------------------------------------------------|--------------------------------------------------------------------------------------------------------------------------------------------------------------------------------|------------------------------------------------------------------------------------------------------------------------------------------------------------------------------------------------------------------------------------------------------------------------------------------------------------------------------------------------------------------------------------------------------------------------------|--|--|--|--|--|-------------------------------------------|
| <b>Time frame: Since the initial planning of the work</b> |                                                                                                                                                                                |                                                                                                                                                                                                                                                                                                                                                                                                                              |  |  |  |  |  |                                           |
| <b>1</b>                                                  | All support for the present manuscript (e.g., funding, provision of study materials, medical writing, article processing charges, etc.)<br><b>No time limit for this item.</b> | <input checked="" type="checkbox"/> <b>None</b><br><table border="1" style="width: 100%; border-collapse: collapse; margin-top: 5px;"> <tr><td style="width: 50%; height: 15px;"></td><td style="width: 50%;"></td></tr> <tr><td style="height: 15px;"></td><td></td></tr> <tr><td style="height: 15px;"></td><td style="text-align: center; font-size: small;">Click the tab key to add additional rows.</td></tr> </table> |  |  |  |  |  | Click the tab key to add additional rows. |
|                                                           |                                                                                                                                                                                |                                                                                                                                                                                                                                                                                                                                                                                                                              |  |  |  |  |  |                                           |
|                                                           |                                                                                                                                                                                |                                                                                                                                                                                                                                                                                                                                                                                                                              |  |  |  |  |  |                                           |
|                                                           | Click the tab key to add additional rows.                                                                                                                                      |                                                                                                                                                                                                                                                                                                                                                                                                                              |  |  |  |  |  |                                           |
| <b>Time frame: past 36 months</b>                         |                                                                                                                                                                                |                                                                                                                                                                                                                                                                                                                                                                                                                              |  |  |  |  |  |                                           |
| <b>2</b>                                                  | Grants or contracts from any entity (if not indicated in item #1 above).                                                                                                       | <input checked="" type="checkbox"/> <b>None</b><br><table border="1" style="width: 100%; border-collapse: collapse; margin-top: 5px;"> <tr><td style="width: 50%; height: 15px;"></td><td style="width: 50%;"></td></tr> <tr><td style="height: 15px;"></td><td></td></tr> <tr><td style="height: 15px;"></td><td></td></tr> </table>                                                                                        |  |  |  |  |  |                                           |
|                                                           |                                                                                                                                                                                |                                                                                                                                                                                                                                                                                                                                                                                                                              |  |  |  |  |  |                                           |
|                                                           |                                                                                                                                                                                |                                                                                                                                                                                                                                                                                                                                                                                                                              |  |  |  |  |  |                                           |
|                                                           |                                                                                                                                                                                |                                                                                                                                                                                                                                                                                                                                                                                                                              |  |  |  |  |  |                                           |
| <b>3</b>                                                  | Royalties or licenses                                                                                                                                                          | <input checked="" type="checkbox"/> <b>None</b><br><table border="1" style="width: 100%; border-collapse: collapse; margin-top: 5px;"> <tr><td style="width: 50%; height: 15px;"></td><td style="width: 50%;"></td></tr> <tr><td style="height: 15px;"></td><td></td></tr> <tr><td style="height: 15px;"></td><td></td></tr> </table>                                                                                        |  |  |  |  |  |                                           |
|                                                           |                                                                                                                                                                                |                                                                                                                                                                                                                                                                                                                                                                                                                              |  |  |  |  |  |                                           |
|                                                           |                                                                                                                                                                                |                                                                                                                                                                                                                                                                                                                                                                                                                              |  |  |  |  |  |                                           |
|                                                           |                                                                                                                                                                                |                                                                                                                                                                                                                                                                                                                                                                                                                              |  |  |  |  |  |                                           |

|    |                                                                                                              | Name all entities with whom you have this relationship or indicate none (add rows as needed)                                                                                                                                                                                                                                                                            | Specifications/Comments (e.g., if payments were made to you or to your institution) |  |  |  |  |  |  |  |  |
|----|--------------------------------------------------------------------------------------------------------------|-------------------------------------------------------------------------------------------------------------------------------------------------------------------------------------------------------------------------------------------------------------------------------------------------------------------------------------------------------------------------|-------------------------------------------------------------------------------------|--|--|--|--|--|--|--|--|
| 4  | Consulting fees                                                                                              | <input checked="" type="checkbox"/> None<br><table border="1" style="width: 100%; border-collapse: collapse;"> <tr><td style="width: 50%; height: 20px;"> </td><td style="width: 50%;"> </td></tr> <tr><td style="height: 20px;"> </td><td> </td></tr> <tr><td style="height: 20px;"> </td><td> </td></tr> <tr><td style="height: 20px;"> </td><td> </td></tr> </table> |                                                                                     |  |  |  |  |  |  |  |  |
|    |                                                                                                              |                                                                                                                                                                                                                                                                                                                                                                         |                                                                                     |  |  |  |  |  |  |  |  |
|    |                                                                                                              |                                                                                                                                                                                                                                                                                                                                                                         |                                                                                     |  |  |  |  |  |  |  |  |
|    |                                                                                                              |                                                                                                                                                                                                                                                                                                                                                                         |                                                                                     |  |  |  |  |  |  |  |  |
|    |                                                                                                              |                                                                                                                                                                                                                                                                                                                                                                         |                                                                                     |  |  |  |  |  |  |  |  |
| 5  | Payment or honoraria for lectures, presentations, speakers bureaus, manuscript writing or educational events | <input checked="" type="checkbox"/> None<br><table border="1" style="width: 100%; border-collapse: collapse;"> <tr><td style="width: 50%; height: 20px;"> </td><td style="width: 50%;"> </td></tr> <tr><td style="height: 20px;"> </td><td> </td></tr> <tr><td style="height: 20px;"> </td><td> </td></tr> </table>                                                     |                                                                                     |  |  |  |  |  |  |  |  |
|    |                                                                                                              |                                                                                                                                                                                                                                                                                                                                                                         |                                                                                     |  |  |  |  |  |  |  |  |
|    |                                                                                                              |                                                                                                                                                                                                                                                                                                                                                                         |                                                                                     |  |  |  |  |  |  |  |  |
|    |                                                                                                              |                                                                                                                                                                                                                                                                                                                                                                         |                                                                                     |  |  |  |  |  |  |  |  |
| 6  | Payment for expert testimony                                                                                 | <input checked="" type="checkbox"/> None<br><table border="1" style="width: 100%; border-collapse: collapse;"> <tr><td style="width: 50%; height: 20px;"> </td><td style="width: 50%;"> </td></tr> <tr><td style="height: 20px;"> </td><td> </td></tr> <tr><td style="height: 20px;"> </td><td> </td></tr> </table>                                                     |                                                                                     |  |  |  |  |  |  |  |  |
|    |                                                                                                              |                                                                                                                                                                                                                                                                                                                                                                         |                                                                                     |  |  |  |  |  |  |  |  |
|    |                                                                                                              |                                                                                                                                                                                                                                                                                                                                                                         |                                                                                     |  |  |  |  |  |  |  |  |
|    |                                                                                                              |                                                                                                                                                                                                                                                                                                                                                                         |                                                                                     |  |  |  |  |  |  |  |  |
| 7  | Support for attending meetings and/or travel                                                                 | <input checked="" type="checkbox"/> None<br><table border="1" style="width: 100%; border-collapse: collapse;"> <tr><td style="width: 50%; height: 20px;"> </td><td style="width: 50%;"> </td></tr> <tr><td style="height: 20px;"> </td><td> </td></tr> <tr><td style="height: 20px;"> </td><td> </td></tr> </table>                                                     |                                                                                     |  |  |  |  |  |  |  |  |
|    |                                                                                                              |                                                                                                                                                                                                                                                                                                                                                                         |                                                                                     |  |  |  |  |  |  |  |  |
|    |                                                                                                              |                                                                                                                                                                                                                                                                                                                                                                         |                                                                                     |  |  |  |  |  |  |  |  |
|    |                                                                                                              |                                                                                                                                                                                                                                                                                                                                                                         |                                                                                     |  |  |  |  |  |  |  |  |
| 8  | Patents planned, issued or pending                                                                           | <input checked="" type="checkbox"/> None<br><table border="1" style="width: 100%; border-collapse: collapse;"> <tr><td style="width: 50%; height: 20px;"> </td><td style="width: 50%;"> </td></tr> <tr><td style="height: 20px;"> </td><td> </td></tr> <tr><td style="height: 20px;"> </td><td> </td></tr> </table>                                                     |                                                                                     |  |  |  |  |  |  |  |  |
|    |                                                                                                              |                                                                                                                                                                                                                                                                                                                                                                         |                                                                                     |  |  |  |  |  |  |  |  |
|    |                                                                                                              |                                                                                                                                                                                                                                                                                                                                                                         |                                                                                     |  |  |  |  |  |  |  |  |
|    |                                                                                                              |                                                                                                                                                                                                                                                                                                                                                                         |                                                                                     |  |  |  |  |  |  |  |  |
| 9  | Participation on a Data Safety Monitoring Board or Advisory Board                                            | <input checked="" type="checkbox"/> None<br><table border="1" style="width: 100%; border-collapse: collapse;"> <tr><td style="width: 50%; height: 20px;"> </td><td style="width: 50%;"> </td></tr> <tr><td style="height: 20px;"> </td><td> </td></tr> <tr><td style="height: 20px;"> </td><td> </td></tr> </table>                                                     |                                                                                     |  |  |  |  |  |  |  |  |
|    |                                                                                                              |                                                                                                                                                                                                                                                                                                                                                                         |                                                                                     |  |  |  |  |  |  |  |  |
|    |                                                                                                              |                                                                                                                                                                                                                                                                                                                                                                         |                                                                                     |  |  |  |  |  |  |  |  |
|    |                                                                                                              |                                                                                                                                                                                                                                                                                                                                                                         |                                                                                     |  |  |  |  |  |  |  |  |
| 10 | Leadership or fiduciary role in other board, society, committee or advocacy group, paid or unpaid            | <input checked="" type="checkbox"/> None<br><table border="1" style="width: 100%; border-collapse: collapse;"> <tr><td style="width: 50%; height: 20px;"> </td><td style="width: 50%;"> </td></tr> <tr><td style="height: 20px;"> </td><td> </td></tr> <tr><td style="height: 20px;"> </td><td> </td></tr> </table>                                                     |                                                                                     |  |  |  |  |  |  |  |  |
|    |                                                                                                              |                                                                                                                                                                                                                                                                                                                                                                         |                                                                                     |  |  |  |  |  |  |  |  |
|    |                                                                                                              |                                                                                                                                                                                                                                                                                                                                                                         |                                                                                     |  |  |  |  |  |  |  |  |
|    |                                                                                                              |                                                                                                                                                                                                                                                                                                                                                                         |                                                                                     |  |  |  |  |  |  |  |  |

|    |                                                                                  | Name all entities with whom you have this relationship or indicate none (add rows as needed)                                                                                                                                                                                                                  | Specifications/Comments (e.g., if payments were made to you or to your institution) |  |  |  |  |  |  |
|----|----------------------------------------------------------------------------------|---------------------------------------------------------------------------------------------------------------------------------------------------------------------------------------------------------------------------------------------------------------------------------------------------------------|-------------------------------------------------------------------------------------|--|--|--|--|--|--|
| 11 | Stock or stock options                                                           | <input checked="" type="checkbox"/> None<br><table border="1" style="width: 100%; border-collapse: collapse;"> <tr><td style="width: 50%; height: 15px;"></td><td style="width: 50%;"></td></tr> <tr><td style="height: 15px;"></td><td></td></tr> <tr><td style="height: 15px;"></td><td></td></tr> </table> |                                                                                     |  |  |  |  |  |  |
|    |                                                                                  |                                                                                                                                                                                                                                                                                                               |                                                                                     |  |  |  |  |  |  |
|    |                                                                                  |                                                                                                                                                                                                                                                                                                               |                                                                                     |  |  |  |  |  |  |
|    |                                                                                  |                                                                                                                                                                                                                                                                                                               |                                                                                     |  |  |  |  |  |  |
| 12 | Receipt of equipment, materials, drugs, medical writing, gifts or other services | <input checked="" type="checkbox"/> None<br><table border="1" style="width: 100%; border-collapse: collapse;"> <tr><td style="width: 50%; height: 15px;"></td><td style="width: 50%;"></td></tr> <tr><td style="height: 15px;"></td><td></td></tr> <tr><td style="height: 15px;"></td><td></td></tr> </table> |                                                                                     |  |  |  |  |  |  |
|    |                                                                                  |                                                                                                                                                                                                                                                                                                               |                                                                                     |  |  |  |  |  |  |
|    |                                                                                  |                                                                                                                                                                                                                                                                                                               |                                                                                     |  |  |  |  |  |  |
|    |                                                                                  |                                                                                                                                                                                                                                                                                                               |                                                                                     |  |  |  |  |  |  |
| 13 | Other financial or non-financial interests                                       | <input checked="" type="checkbox"/> None<br><table border="1" style="width: 100%; border-collapse: collapse;"> <tr><td style="width: 50%; height: 15px;"></td><td style="width: 50%;"></td></tr> <tr><td style="height: 15px;"></td><td></td></tr> <tr><td style="height: 15px;"></td><td></td></tr> </table> |                                                                                     |  |  |  |  |  |  |
|    |                                                                                  |                                                                                                                                                                                                                                                                                                               |                                                                                     |  |  |  |  |  |  |
|    |                                                                                  |                                                                                                                                                                                                                                                                                                               |                                                                                     |  |  |  |  |  |  |
|    |                                                                                  |                                                                                                                                                                                                                                                                                                               |                                                                                     |  |  |  |  |  |  |

Please place an "X" next to the following statement to indicate your agreement:

**Summary NO conflicts of interests**

I certify that I have answered every question and have not altered the wording of any of the questions on this form.
