# Supplementary material for: Bronchogenic cysts: a narrative review
Source: PubMed Central journal article supplement — Mediastinum. 2023 Apr 20;7:26. doi: 10.21037/med-22-46 (PMC10493618; doi:10.21037/med-22-46), 2023-04-20
Supplement: med-07-26-prf.pdf [file med-07-26-prf.pdf]

## Peer Review File

Article information: <https://dx.doi.org/10.21037/med-22-46>

### Review Comments

The authors present a narrative review of the clinical presentation, histopathologic features and treatment of bronchogenic cysts via a review of the literature on the subject. There are only minor grammatical/topographic errors that need to be addressed.

1. Abstract: “with minimally invasive approaches such as Robotic assisted and thoracoscopic aiding treatment”. This sentence seems incomplete and lacks cohesion. Please revise.

[Reply #1: Revised for grammar and fluidity of language](#)

[Changes in the text: Please see changes on page 2 line 10-11 for changes](#)

2. Throughout the manuscript: please use upper and lower case letters according to the position of the words in the sentence. For example in Methods: “series in the Adult and pediatric peer reviewed literature...”. Adult should all be lower case letters. There are several issues like this throughout the manuscript. Please revise.

[Reply #2: Edited throughout the text](#)

[Changes in the text: Please see the tracks.](#)

3. Conclusion: instead of “the authors evolution” I would propose to use “the authors’ experience.”

[Reply #3: changed in text](#)

[Changes in the text: Please see line page 3 line 31 for changes](#)

4. Figures: “35 year-old”, not “35 years-old.” Please revise throughout manuscript.

[Reply #4: Edited throughout the text](#)

[Changes in the text: Please see revised figure legends on page 8 and 9](#)

5. Figure 4. Please add details of histological stains used.

[Reply #5: added hemoxylin and eosin stain to title of figure](#)

Changes in the text: Please see page 11 lines 3-4

6. Figure 4C. “images shown in Fig. 2s”. 2s or 2A/B? Please check.

Reply #6: Done

Changes in the text: Please see modification to the legend page 11 line 10

7. Figure 4A/B. The pictures of this lesion may actually represent a unilocular thymic cyst (that may sometimes present with respiratory rather than squamous epithelium), especially in the absence of any other defining features of a bronchogenic cyst. Please double check with your pathology collaborators.

Reply #7: We confirmed the initial description after review.

Changes in the text: No changes necessary
