# Supplementary material for: Bronchogenic cysts: a narrative review
Source: PubMed Central journal article supplement — Mediastinum. 2023 Apr 20;7:26. doi: 10.21037/med-22-46 (PMC10493618; doi:10.21037/med-22-46), 2023-04-20
Supplement: med-07-26-rc.pdf [file med-07-26-rc.pdf]

## Narrative Review Checklist

| Section/Topic             | Item No | Item                                                                                                                                                                               | Reported on Page Number/Line Number | Reported on Section/Paragraph      |
|---------------------------|---------|------------------------------------------------------------------------------------------------------------------------------------------------------------------------------------|-------------------------------------|------------------------------------|
| <b>TITLE</b>              |         |                                                                                                                                                                                    |                                     |                                    |
| Title                     | 1       | Identify the report as a Narrative Review or Literature Review.                                                                                                                    | P1/L1                               | Title                              |
| <b>ABSTRACT</b>           |         |                                                                                                                                                                                    |                                     |                                    |
| Structured summary        | 2       | Provide a structured summary with the subsections as: Background and Objective, Methods, Key Content and Findings, Conclusions.                                                    | P2/L2-28                            | Abstract                           |
| <b>INTRODUCTION</b>       |         |                                                                                                                                                                                    |                                     |                                    |
| Rationale/background      | 3       | Describe the rationale for the review in the context of what is already known.                                                                                                     | P2/L31-P3/L5                        | Introduction                       |
| Objectives                | 4       | Specify the key question(s) identified for the review topic.                                                                                                                       | P3/L5-6                             | Introduction                       |
| <b>METHODS</b>            |         |                                                                                                                                                                                    |                                     |                                    |
| Research selection        | 5       | Specify the process for identifying the literature search (eg, years considered, language, publication status, study design, and databases of coverage).                           | P3/L11-15                           | Methods                            |
| <b>DISCUSSION/SUMMARY</b> |         |                                                                                                                                                                                    |                                     |                                    |
| Narrative                 | 6       | Discuss: 1) research reviewed including fundamental or key findings, 2) limitations and/or quality of research reviewed, and 3) need for future research.                          | P3/L19-P4/L17                       | Clinical Presentations & Treatment |
| Summary                   | 7       | Provide an overall interpretation of the narrative review in the context of clinical practice for health professionals, policy development and implementation, or future research. | P4/L21-30                           | Conclusion                         |

Article information: <https://dx.doi.org/10.21037/med-22-46>

\*As the checklist was provided upon initial submission, the page number/line number reported may be changed due to copyediting and may not be referable in the published version. In this case, the section/paragraph may be used as an alternative reference.
